# Supplementary material for: Humoral immunity in dually vaccinated SARS-CoV-2-naïve individuals and in booster-vaccinated COVID-19-convalescent subjects
Source: Springer Nature journal article supplement (doi:10.1007/s15010-022-01817-8), 2022-04-11
Supplement: MOESM1 [file 20302008]

## *Online Supplementary Material*

### **Humoral Immunity in Dually Vaccinated SARS-CoV-2 Naïve Individuals and in Booster-Vaccinated COVID-19 Convalescent Subjects**

Vivian Glück<sup>1</sup>, Leonid Tydykov<sup>1</sup>, Anna-Lena Mader<sup>1</sup>, Anne-Sophie Warda<sup>2</sup>, Manuela Bertok<sup>2</sup>, Tanja Weidlich<sup>2</sup>, Christine Gottwald<sup>2</sup>, Josef Köstler<sup>1</sup>, Bernd Salzberger<sup>3</sup>, Ralf Wagner<sup>1,4</sup>, Michael Koller<sup>5</sup>, André Gessner<sup>1,4</sup>, Barbara Schmidt<sup>1,4</sup>, Thomas Glück<sup>2</sup>, David Peterhoff<sup>1,4\*</sup>

<sup>1</sup> Institute for Clinical Microbiology and Hygiene, University Hospital Regensburg, Regensburg, Germany

<sup>2</sup> Kliniken Südostbayern AG, Klinikum Traunstein, Traunstein, Germany

<sup>3</sup> Department for Infection Control and Infectious Diseases, University Hospital Regensburg, Regensburg, Germany

<sup>4</sup> Institute for Medical Microbiology and Hygiene, University of Regensburg, Regensburg, Germany

<sup>5</sup> Center for Clinical Studies, University Hospital Regensburg, Regensburg, Germany

\* Correspondence: david.peterhoff@ur.de

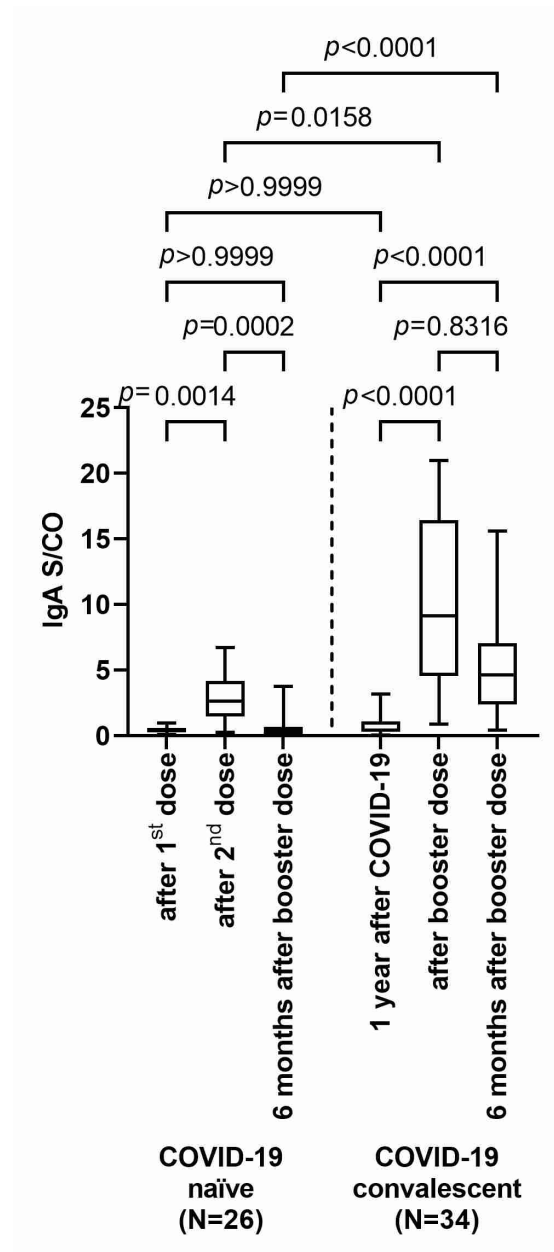

**Fig. S1:** Anti-spike protein receptor-binding domain (RBD) IgA antibody reactivities (S/CO=signal/cutoff) at different time points relative to vaccinations and booster doses in COVID-19 naïve individuals and COVID-19 convalescent subjects (Kruskal-Wallis-Test with Dunn's multiple comparison post test).

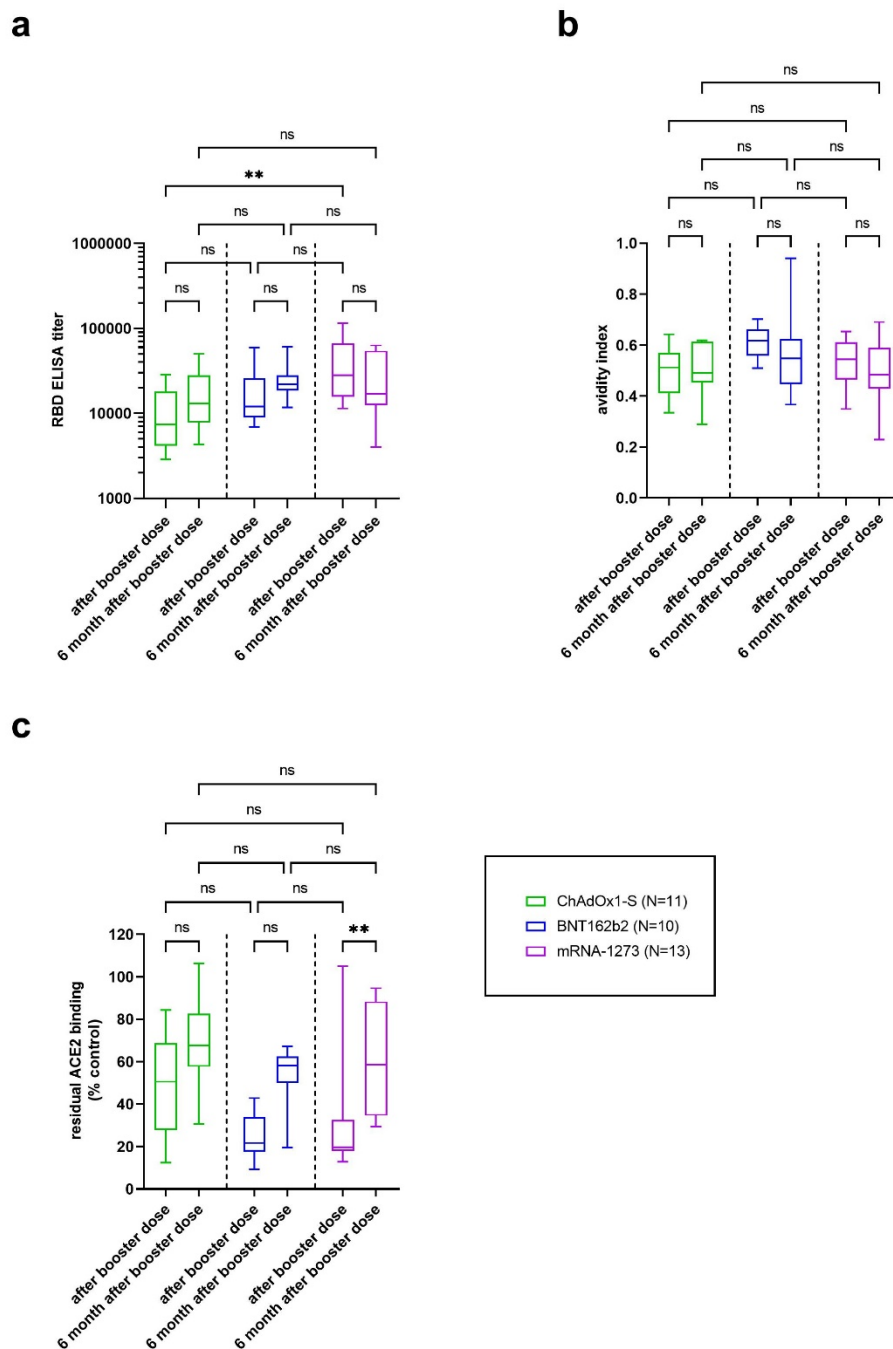

**Fig. S2:** Anti-spike protein receptor-binding domain (RBD) antibody titers (a), serum avidity index (b), and residual ACE-2 binding (c) at various time points relative to vaccinations and booster doses in COVID-19 naïve individuals and COVID-19 convalescents, stratified according to type of vaccine (Kruskal-Wallis-Test with Dunn's multiple comparison post test,  $p$ -value style: 0.1234 (ns), 0.0332 (\*), 0.0021 (\*\*), 0.0002 (\*\*\*), <0.0001 (\*\*\*\*)).

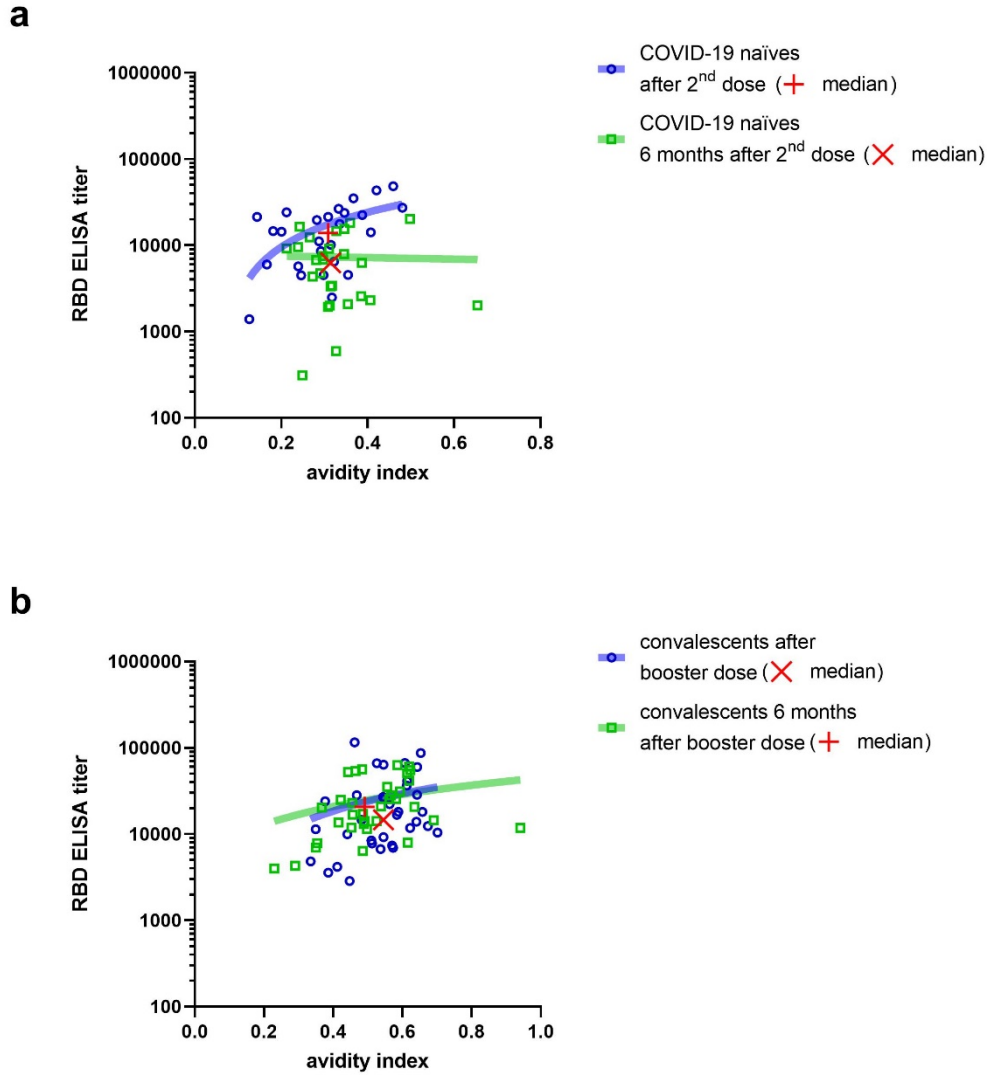

**Fig. S3:** Correlation between anti-spike protein receptor-binding domain (RBD) antibody titers and serum avidity index at various time points relative to vaccinations and booster doses in COVID-19 naïve individuals (a) and COVID-19 convalescents (b). Associated Pearson  $r$ /Spearman's  $\rho$  values (and their corresponding two-tailed  $p$ -values) are 0.5469/0.4940 (0.0038/0.0103) for COVID-19-naïves after the 2<sup>nd</sup> vaccine dose, -0.02277/-0.1029 (0.9121/0.6169) for COVID-19-naïves 6 months after the 2<sup>nd</sup> vaccine dose, 0.2003/0.3711 (0.2560/0.0307) for COVID-19 convalescents after the booster dose, and 0.2857/0.4203 (0.1014/0.0133) for COVID-19 convalescents 6 months after the booster dose.
